# Supplementary material for: Emergency presentation of cancer and short-term mortality
Source: PubMed Central journal article supplement — Br J Cancer. 2013 Sep 17;109(8):2027–34. doi: 10.1038/bjc.2013.569 (PMC3798965; doi:10.1038/bjc.2013.569), 2013-09-17
Supplement: bjc2013569x1.pdf [file bjc2013569x1.pdf]

| Characteristic                                                                                                       | England  |             |            |     |           |       | ECRIC Area |             |      |           |          |           |
|----------------------------------------------------------------------------------------------------------------------|----------|-------------|------------|-----|-----------|-------|------------|-------------|------|-----------|----------|-----------|
|                                                                                                                      | Cervical |             | Colorectal |     |           |       | Breast     |             | Lung |           | Prostate |           |
|                                                                                                                      | OR       | 95% CI      |            | OR  | 95% CI    |       | OR         | 95% CI      | OR   | 95% CI    | OR       | 95% CI    |
| <b>Sex</b>                                                                                                           |          |             |            |     |           |       |            |             |      |           |          |           |
| Male                                                                                                                 | -        |             |            | 1.0 |           |       | -          |             | 1.0  |           | -        |           |
| Female                                                                                                               | -        | -           |            | 1.2 | (1.2-1.3) |       | -          | -           | 1.1  | (1.0-1.3) | -        | -         |
| <b>Stage</b>                                                                                                         |          |             |            |     |           |       |            |             |      |           |          |           |
| FIGO 1                                                                                                               | 1.0      |             | Dukes A    | 1.0 |           | TNM 1 | 1.0        |             | 1.0  |           | -        |           |
| FIGO 2                                                                                                               | 3.9      | (2.9-5.2)   | Dukes B    | 3.5 | (3.2-3.8) | TNM 2 | 1.6        | (1.1-2.3)   | 1.0  | (0.8-1.4) | 1.0      |           |
| FIGO 3                                                                                                               | 7.7      | (5.7-10.5)  | Dukes C    | 4.6 | (4.2-5.0) | TNM 3 | 6.9        | (4.7-10.3)  | 1.9  | (1.6-2.3) | 1.4      | (1.0-1.9) |
| FIGO 4                                                                                                               | 16.7     | (12.3-22.5) | Dukes D    | 7.4 | (6.7-8.1) | TNM 4 | 33.4       | (23.2-48.2) | 3.7  | (3.1-4.4) | 7.0      | (5.8-8.5) |
| <b>Age</b>                                                                                                           |          |             |            |     |           |       |            |             |      |           |          |           |
| 0-24                                                                                                                 | 1.2      | (0.6-2.5)   |            | 2.4 | (1.4-4.0) |       | -          |             | -    |           | -        |           |
| 25-64                                                                                                                | 1.0      |             |            | 1.0 |           |       | 1.0        |             | 1.0  |           | 1.0      |           |
| 65-84                                                                                                                | 1.3      | (1.0-1.6)   |            | 1.1 | (1.1-1.2) |       | 2.9        | (2.2-3.8)   | 1.4  | (1.3-1.6) | 1.6      | (1.2-2.1) |
| 85+                                                                                                                  | 2.6      | (1.7-4.0)   |            | 2.3 | (2.1-2.5) |       | 9.9        | (7.0-14.2)  | 3.8  | (3.2-4.6) | 6.7      | (4.9-9.2) |
| <b>Co-morbidity</b>                                                                                                  |          |             |            |     |           |       |            |             |      |           |          |           |
| Charlson 0                                                                                                           | 1.0      |             |            | 1.0 |           |       | 1.0        |             | 1.0  |           | 1.0      |           |
| Charlson 1                                                                                                           | 1.1      | (0.7-1.7)   |            | 1.4 | (1.3-1.5) |       | 1.3        | (0.8-2.0)   | 1.3  | (1.1-1.5) | 1.2      | (0.9-1.6) |
| Charlson 2                                                                                                           | 1.0      | (0.4-2.1)   |            | 1.3 | (1.2-1.4) |       | 1.7        | (0.9-3.4)   | 1.3  | (1.0-1.7) | 1.7      | (1.2-2.5) |
| Charlson 3+                                                                                                          | 2.2      | (0.9-5.1)   |            | 1.7 | (1.5-2.0) |       | 1.9        | (0.8-4.8)   | 1.6  | (1.2-2.1) | 1.5      | (0.9-2.5) |
| <b>Income Deprivation</b>                                                                                            |          |             |            |     |           |       |            |             |      |           |          |           |
| Least deprived                                                                                                       | 1.0      |             |            | 1.0 |           |       | 1.0        |             | 1.0  |           | 1.0      |           |
| 2                                                                                                                    | 1.4      | (0.9-2.0)   |            | 1.0 | (1.0-1.1) |       | 0.8        | (0.5-1.1)   | 1.1  | (0.9-1.3) | 1.0      | (0.8-1.3) |
| 3                                                                                                                    | 1.6      | (1.1-2.4)   |            | 1.1 | (1.1-1.2) |       | 0.9        | (0.7-1.3)   | 1.1  | (1.0-1.3) | 1.3      | (1.0-1.7) |
| 4                                                                                                                    | 1.4      | (0.9-2.0)   |            | 1.2 | (1.1-1.3) |       | 1.0        | (0.7-1.5)   | 1.2  | (1.0-1.4) | 1.4      | (1.0-1.8) |
| Most Deprived                                                                                                        | 1.8      | (1.2-2.6)   |            | 1.5 | (1.4-1.6) |       | 1.2        | (0.7-1.9)   | 1.4  | (1.2-1.8) | 1.7      | (1.2-2.5) |
| Abbreviations: ECRIC = Eastern Cancer Registration and Information Centre; OR = odds ratio; CI = confidence interval |          |             |            |     |           |       |            |             |      |           |          |           |

**Table 2b** For complete cases only. Odd ratios for Emergency Presentation and 95% confidence intervals from a multivariate logistic model. Persons resident in England (cervical and colorectal) or the ECRIC registration area (breast, lung, and prostate) diagnosed in 2006-2008.

| Period/Characteristic | England  |              |            |             | ECRIC registration area |              |      |             |          |              |
|-----------------------|----------|--------------|------------|-------------|-------------------------|--------------|------|-------------|----------|--------------|
|                       | Cervical |              | Colorectal |             | Breast                  |              | Lung |             | Prostate |              |
|                       | EMRR     | 95%CI        | EMRR       | 95%CI       | EMRR                    | 95%CI        | EMRR | 95%CI       | EMRR     | 95%CI        |
| <b>0-1 month</b>      |          |              |            |             |                         |              |      |             |          |              |
| Presentation route    | 10.4     | (5.2 - 21.1) | 7.1        | (6.4 - 7.7) | 18.7                    | (9.8 - 35.7) | 5.2  | (4.5 - 5.9) | 13.3     | (5.5 - 31.9) |
| Age                   | 1.7      | (1.2 - 2.4)  | 2.1        | (2.0 - 2.3) | 1.8                     | (1.3 - 2.5)  | 1.6  | (1.5 - 1.8) | 2.3      | (1.4 - 3.8)  |
| Co-morbidity          | 1.3      | (0.8 - 1.9)  | 1.2        | (1.1 - 1.2) | 1.4                     | (1.0 - 2.0)  | 1.0  | (1.0 - 1.1) | 1.4      | (1.1 - 1.9)  |
| Sex                   | -        | -            | 1.0        | (0.9 - 1.1) | -                       | -            | 0.9  | (0.8 - 1.0) | -        | -            |
| Income deprivation    | 1.0      | (0.8 - 1.2)  | 1.1        | (1.1 - 1.1) | 1.1                     | (0.9 - 1.4)  | 1.0  | (1.0 - 1.1) | 1.0      | (0.8 - 1.3)  |
| Stage                 | 2.4      | (1.8 - 3.3)  | 2.0        | (1.9 - 2.1) | 3.8                     | (2.7 - 5.4)  | 1.5  | (1.4 - 1.7) | 2.6      | (1.6 - 4.3)  |
| <b>1-3 months</b>     |          |              |            |             |                         |              |      |             |          |              |
| Presentation route    | 2.3      | (1.5 - 3.4)  | 2.1        | (2.0 - 2.3) | 2.4                     | (1.3 - 4.2)  | 2.4  | (2.1 - 2.6) | 5.2      | (3.2 - 8.5)  |
| Age                   | 2.3      | (1.8 - 3.1)  | 1.9        | (1.8 - 2.0) | 1.8                     | (1.2 - 2.7)  | 1.4  | (1.3 - 1.6) | 2.3      | (1.5 - 3.3)  |
| Co-morbidity          | 1.3      | (1.0 - 1.7)  | 1.2        | (1.1 - 1.3) | 0.6                     | (0.2 - 2.0)  | 1.1  | (1.1 - 1.2) | 1.2      | (0.9 - 1.6)  |
| Sex                   | -        | -            | 1.0        | (0.9 - 1.1) | -                       | -            | 1.0  | (0.9 - 1.1) | -        | -            |
| Income deprivation    | 1.0      | (0.9 - 1.2)  | 1.1        | (1.0 - 1.1) | 1.1                     | (0.9 - 1.3)  | 1.0  | (1.0 - 1.1) | 1.1      | (0.9 - 1.3)  |
| Stage                 | 2.9      | (2.3 - 3.6)  | 3.8        | (3.6 - 4.1) | 14.4                    | (5.9 - 35.1) | 1.9  | (1.8 - 2.1) | 3.6      | (2.3 - 5.8)  |
| <b>3-6 months</b>     |          |              |            |             |                         |              |      |             |          |              |
| Presentation route    | 2.5      | (1.7 - 3.8)  | 1.8        | (1.7 - 2.0) | 2.1                     | (1.1 - 4.0)  | 1.9  | (1.6 - 2.2) | 6.1      | (3.6 - 10.4) |
| Age                   | 2.1      | (1.6 - 2.9)  | 1.5        | (1.4 - 1.7) | 1.9                     | (1.3 - 2.9)  | 1.4  | (1.3 - 1.6) | 1.5      | (1.0 - 2.2)  |
| Co-morbidity          | 1.1      | (0.8 - 1.5)  | 1.2        | (1.1 - 1.3) | 1.7                     | (1.1 - 2.4)  | 1.0  | (1.0 - 1.2) | 2.0      | (1.6 - 2.4)  |
| Sex                   | -        | -            | 1.1        | (1.0 - 1.2) | -                       | -            | 0.9  | (0.8 - 1.0) | -        | -            |
| Income deprivation    | 1.1      | (0.9 - 1.2)  | 1.0        | (1.0 - 1.1) | 1.3                     | (1.0 - 1.6)  | 1.0  | (1.0 - 1.1) | 0.9      | (0.8 - 1.1)  |
| Stage                 | 3.0      | (2.4 - 3.7)  | 5.4        | (5.0 - 5.9) | 6.2                     | (4.2 - 9.3)  | 1.9  | (1.8 - 2.1) | 2.2      | (1.6 - 3.0)  |
| <b>6-12 months</b>    |          |              |            |             |                         |              |      |             |          |              |
| Presentation route    | 2.7      | (2.0 - 3.6)  | 1.9        | (1.7 - 2.1) | 2.1                     | (1.3 - 3.4)  | 1.3  | (1.2 - 1.5) | 2.4      | (1.5 - 3.7)  |
| Age                   | 1.4      | (1.1 - 1.8)  | 1.3        | (1.2 - 1.4) | 1.8                     | (1.3 - 2.4)  | 1.3  | (1.2 - 1.5) | 1.0      | (0.7 - 1.5)  |
| Co-morbidity          | 1.4      | (1.1 - 1.7)  | 1.2        | (1.1 - 1.3) | 1.6                     | (1.3 - 2.1)  | 1.0  | (0.9 - 1.1) | 1.5      | (1.2 - 1.9)  |
| Sex                   | -        | -            | 1.1        | (1.1 - 1.2) | -                       | -            | 0.9  | (0.8 - 1.0) | -        | -            |
| Income deprivation    | 1.1      | (1.0 - 1.2)  | 1.1        | (1.0 - 1.1) | 1.0                     | (0.9 - 1.2)  | 1.0  | (1.0 - 1.1) | 1.0      | (0.9 - 1.2)  |
| Stage                 | 2.5      | (2.2 - 2.9)  | 5.3        | (4.9 - 5.7) | 4.6                     | (3.7 - 5.7)  | 1.9  | (1.8 - 2.0) | 5.8      | (3.3 - 10.1) |

Abbreviations: EMRR = Excess Mortality Rate Ratio; CI = confidence interval

**Table 3b**      *For complete cases only.* Excess mortality rate ratios and 95% confidence intervals at 0-1, 1-3, 3-6, and 6-12 months after diagnosis from a multivariate model. Rate ratios show the increase in excess mortality in the period per step increase in presentation (non-emergency or emergency), age (25-64, 65-84, or 85+), Co-morbidity (Charlson 0, 1, 2, 3+), sex (male or female), income deprivation (quintiles from least to most income deprivation), or stage (increasing FIGO, Dukes or TNM integrated stage on a four point scale). The model included persons resident in England (cervical and colorectal cancer) or the ECRIC registration area (breast, lung, and prostate cancer) diagnosed in 2006-2008.
